# Supplementary material for: Do Spanish Triathletes Consume Sports Supplements According to Scientific Evidence? An Analysis of the Consumption Pattern According to Sex and Level of Competition
Source: MDPI journal article supplement (doi:10.3390/nu15061330), 2023-03-08
Supplement: s1 [file s1]

# Proyecto de Investigación "Consumo de suplementos nutricionales en triatletas"

Las respuestas a este cuestionario servirán para valorar y cuantificar el uso de suplementos en su deporte. Los resultados colectivos del cuestionario nos ayudarán a describir el patrón de consumo de suplementos en triatletas y plantear recomendaciones sobre el consumo de los mismos.

Se trata de un cuestionario CONFIDENCIAL. Toda la información será analizada por personal técnico sujeto al secreto profesional y utilizada exclusivamente para los fines descritos. La Ley Orgánica 3/2018 de Protección de Datos será respetada en todo momento. Este estudio ha sido aprobado por el comité de ética de la Universidad de Alicante (#UA 2021-02-01). En el informe de resultados no podrán ser identificadas las respuestas de ninguna persona de forma individualizada.

Para participar en el estudio es necesario ser mayor de edad y contestar INDIVIDUALMENTE. Por ello te pedimos que respondas siguiendo las instrucciones de cada pregunta para contestar. Es muy importante que contestes TODAS LAS PREGUNTAS ya que muchas se tratan conjuntamente, de manera que si dejas alguna pregunta sin contestar es probable que otras que hayas contestado se anulen y se pierda la información para el análisis de resultados.

Para llevar a cabo esta investigación se ha creado un Grupo de Trabajo formado: Samuel Hernández ([shn.nutrition@gmail.com](mailto:shn.nutrition@gmail.com)), Rubén Jiménez ([rja10@gcloud.ua.es](mailto:rja10@gcloud.ua.es)), Isabel Sospedra ([isospedra@ua.es](mailto:isospedra@ua.es)) y José Miguel Martínez ([josemiguel.ms@ua.es](mailto:josemiguel.ms@ua.es)). Si necesitas realizar alguna consulta te puedes dirigir a cualquiera de sus miembros.

MUCHAS GRACIAS POR TU COLABORACIÓN

## CONSENTIMIENTO:

- Soy mayor de edad (+18 años).
- He sido informado/a de las características del Proyecto de Investigación titulado: "Estudio del consumo de suplementos nutricionales en maratonianos".
- He leído la información del proyecto, y he podido formular las dudas que me han surgido al respecto.
- Considero que he entendido dicha información.
- Estoy informado/a de la posibilidad de retirarme en cualquier momento del estudio.
- Estoy informado del modo en que serán tratados mis datos.
- No rellenar más de una inscripción por persona y escribir en MAYÚSCULAS todas las respuestas que requieran texto.

**\*Obligatorio**

1. En virtud de tales condiciones ¿consientes participar en este estudio? \*

*Marca solo un óvalo.*

☐ Si

☐ No

## DATOS INICIALES

2. SEXO \*

*Marca solo un óvalo.*

☐ Hombre

☐ Mujer

3. FECHA DE NACIMIENTO \*

---

*Ejemplo: 7 de enero del 2019*

## 4. Comunidad Autónoma de residencia \*

*Marca solo un óvalo.*

- ☐ Andalucía
- ☐ Cataluña
- ☐ Comunidad de Madrid
- ☐ Comunidad Valenciana
- ☐ Galicia
- ☐ Castilla y León
- ☐ País Vasco
- ☐ Canarias
- ☐ Castilla-La Mancha
- ☐ Región de Murcia
- ☐ Aragón
- ☐ Isla Baleares
- ☐ Extremadura
- ☐ Principado de Asturias
- ☐ Navarra
- ☐ Cantabria
- ☐ La Rioja
- ☐ Melilla
- ☐ Ceuta

## 5. ALTURA APROXIMADA EN CENTÍMETROS (cm) \*

En centímetros

---

## 6. PESO APROXIMADO EN KILOGRAMOS (kg) \*

En kilogramos

---

## 7. % APROXIMADO DE GRASA (Solo si se sabe la respuesta)

Porcentaje

---

## PRÁCTICA DEL DEPORTE

## 8. INDICA EL NÚMERO DE AÑOS APROXIMADO QUE LLEVAS FEDERADO \*

*Marca solo un óvalo.*☐ No estoy federado☐ 1 año☐ 2 años☐ 3 años☐ 4 años☐ 5 años☐ 6 años☐ 7 años☐ 8 años☐ 9 años☐ 10 o más años

## 9. INDICA EN EL NIVEL QUE COMPITES ACTUALMENTE \*

Señala el de mayor categoría

*Marca solo un óvalo.*☐ Provincial o autonómico☐ Nacional☐ Europeo☐ Mundial☐ Olímpico☐ Otro: \_\_\_\_\_

10. INDICA LOS AÑOS QUE LLEVAS COMPITIENDO EN EL NIVEL SEÑALADO ANTERIORMENTE

\*

*Marca solo un óvalo.*

- ☐ 1 año
- ☐ 2 años
- ☐ 3 años
- ☐ 4 años
- ☐ 5 años
- ☐ 6 años
- ☐ 7 años
- ☐ 8 años
- ☐ 9 años
- ☐ 10 o más años

ENTRENAMIENTO Y COMPETICIÓN

11. ¿CUÁNTOS DÍAS DE MEDIA DEDICAS AL ENTRENAMIENTO A LA SEMANA?

\*

APROXIMADAMENTE

*Marca solo un óvalo.*

- ☐ 1 día
- ☐ 2 días
- ☐ 3 días
- ☐ 4 días
- ☐ 5 días
- ☐ 6 días
- ☐ 7 días

12. ¿CUÁNTO TIEMPO, APROXIMADAMENTE, DEDICAS CADA DÍA AL ENTRENAMIENTO? \*

Elige el intervalo de tiempo que más se ajuste a tu tiempo de entrenamiento

*Marca solo un óvalo.*

- ☐ <30 minutos
- ☐ Entre 30 minutos y 1 hora
- ☐ Entre 1 hora y 1,5 horas
- ☐ Entre 1,5 horas y 2 horas
- ☐ >2 horas

13. SUELES ENTRENAR... \*

Elige el intervalo de tiempo que más se ajuste a tu tiempo de entrenamiento

*Marca solo un óvalo.*

- ☐ Por la mañana
- ☐ Por la tarde
- ☐ Por la mañana y la tarde
- ☐ Otro: \_\_\_\_\_

## 14. ¿CUÁNTAS COMPETICIONES TIENES AL AÑO? \*

Elige la opción que más se acerque a la realidad

*Marca solo un óvalo.*

- ☐ 1
- ☐ 2
- ☐ 3
- ☐ 4
- ☐ 5
- ☐ 6
- ☐ 7
- ☐ 8
- ☐ 9
- ☐ 10
- ☐ 11
- ☐ 12
- ☐ más de 12
- ☐ Sin frecuencia exacta
- ☐ No sabe no contesta

## 15. ¿EN QUÉ DISTANCIA SUELES COMPETIR? (Indicar en la que más participes. Si es Otra distancia, indicar distancia)

*Selecciona todos los que correspondan.*

- ☐ Triatlón Sprint
- ☐ Triatlón Olímpico
- ☐ Triatlón Media Distancia o Medio Ironman
- ☐ Triatlón Larga Distancia o Ironman
- ☐ Medio Ultraman
- ☐ Ultraman
- ☐ Otro: \_\_\_\_\_

## 16. SUELES COMPETIR... \*

Elige el intervalo de tiempo que más se ajuste a tu tiempo de entrenamiento

*Marca solo un óvalo.*

- ☐ Por la mañana
- ☐ Por la tarde
- ☐ Por la mañana y la tarde
- ☐ Otro: \_\_\_\_\_

## DIETA

## 17. ¿SIGUES EN LA ACTUALIDAD ALGÚN TIPO DE DIETA O FORMA CONCRETA DE ALIMENTARSE? \*

*Marca solo un óvalo.*

- ☐ Si      *Salta a la pregunta 18*
- ☐ No      *Salta a la pregunta 21*

## DIETA CONTINUACIÓN



## 18. ¿QUÉ TIPO DE DIETA ES? \*

*Marca solo un óvalo.*

- ☐ Vegetariana
- ☐ Vegana
- ☐ Mediterránea
- ☐ Ovolactovegetariana
- ☐ Paleo
- ☐ Disociada
- ☐ Macrobiotica
- ☐ Flexible
- ☐ Cetogénica
- ☐ Otro: \_\_\_\_\_

## 19. ¿POR QUÉ LA HACES? \*

*Marca solo un óvalo.*

- ☐ Para cuidar tu salud
- ☐ Por estética
- ☐ Por enfermedad
- ☐ Por rendimiento
- ☐ Por religión o creencias
- ☐ Otro: \_\_\_\_\_

20. ¿TE LLEVA ALGUIEN O TE APOYAS EN ALGO PARA LLEVAR LA DIETA? \*  
EN CASO AFIRMATIVO INDICA LA RESPUESTA ADECUADA.

*Marca solo un óvalo.*

- ☐ No
- ☐ Dietista-Nutricionista
- ☐ Médico
- ☐ Farmaceutico
- ☐ Entrenado Personal
- ☐ Fisioterapeuta
- ☐ Alguien sin ningula titulación
- ☐ Me apoyo en un libro
- ☐ Me apoyo en un blog
- ☐ Me apoyo en un amigo
- ☐ Me apoyo en Redes Sociales
- ☐ Otro: \_\_\_\_\_

## SUPLEMENTOS

21. ¿ESTÁS A FAVOR DEL CONSUMO DE SUPLEMENTOS EN LA ACTIVIDAD FÍSICA DENTRO DE LA LEGALIDAD? \*

*Marca solo un óvalo.*

- ☐ Si
- ☐ No
- ☐ No sabes/No contestas

22. ¿HAS CONSUMIDO EN ALGUNA OCASIÓN ALGÚN SUPLEMENTO NUTRICIONAL?

\*

*Marca solo un óvalo.*

☐ Si      *Salta a la pregunta 23*

☐ No

SUPLEMENTOS CONTINUACIÓN

23. SEÑALA CUALES DE ESTOS SUPLEMENTOS CONSUMES DE MANERA \*  
HABITUAL

ESTÁN ORDENADOS ALFABÉTICAMENTE. PUEDES SEÑALAR TANTOS CUANTOS  
CONSUMAS DE MANERA HABITUAL

*Selecciona todos los que correspondan.*

- ☐ 5-HTP (5-Hidroxitriptofano)
- ☐ ATP
- ☐ Ácido Aspártico
- ☐ Ácido Alfa Lipoico (ALA)
- ☐ Ácido Fosfatídico
- ☐ Ácido Hialurónico
- ☐ Ácidos Grasos  $\omega$ -3
- ☐ Ácidos Grasos  $\omega$ -6
- ☐ Ácidos Grasos  $\omega$ -9
- ☐ Ácido Linoleico Conjugado (CLA)
- ☐ Aceite de Coco
- ☐ Aceite de Hígado de Bacalao
- ☐ Aceite de Lino
- ☐ Aceite de Onagra
- ☐ Aceite de Prímula
- ☐ Amilopectina
- ☐ Aminoácidos esenciales (EEAA)
- ☐ Aminoácidos ramificados (BCAA)
- ☐ Arginina
- ☐ Barritas Energéticas o Deportivas
- ☐ Barritas Proteicas
- ☐ Bebida Isotónica o de Reposición
- ☐ Beta Alanina
- ☐ Bicarbonatos
- ☐ Bloqueadores de Carbohidratos
- ☐ Cafeína (capsula, pastilla, liquido o chicle)
- ☐ Carbohidratos ("Gainers")
- ☐ Carnitina (Acetil-L-Carnitina)
- ☐ Carnitina (L-Carnitina)
- ☐ Cartílago de Tiburón
- ☐ Caseína Micelar
- ☐ Chitosan
- ☐ Ciclodextrinas
- ☐ Cinc
- ☐ Citrulina (Malato o L-citrulina)
- ☐ Complejo Mineral

- ☐ Complejo Vitamínico
- ☐ Colágeno
- ☐ Condroitina
- ☐ Creatina (Monohidrato)
- ☐ Creatina (Kre-Alkalyn)
- ☐ Creatina (Etil Éster)
- ☐ Curcumina
- ☐ Dextrosa
- ☐ Dimetilglicina
- ☐ Diuréticos
- ☐ Electrolitos (en polvo o pastillas)
- ☐ Epicatequina
- ☐ Epigallocatequina-3-galato (EGCG)
- ☐ Espirulina
- ☐ Fórmulas pre-entreno
- ☐ Fosfato de sodio
- ☐ Geles deportivos
- ☐ Ginseng
- ☐ Glicerol
- ☐ Glucosamina
- ☐ Glutamina
- ☐ Gominolas
- ☐ Greens
- ☐ Guarana
- ☐ Hidrolizado de caseína
- ☐ Hidroximetilbutirato (HMB)
- ☐ Hierro
- ☐ Isomaltulosa
- ☐ Jalea Real
- ☐ Lecitina de Soja
- ☐ Leucina
- ☐ Levadura de Cerveza
- ☐ Magnesio
- ☐ Maltodextrina
- ☐ Melatonina
- ☐ Mentol
- ☐ Metil-sulfonil-metano (MSM)
- ☐ Nitrato (zumo de remolacha)
- ☐ Nootrópicos
- ☐ N-Acetilcisteína
- ☐ Picolinato de Cromo
- ☐ Polen

- ☐ Potenciador de Testosterona
- ☐ Precursor Hormonal
- ☐ Probióticos
- ☐ Proteína de Carne
- ☐ Proteína de Suero (Whey Protein)
- ☐ Proteína Vegetal (soja, cáñamo...)
- ☐ Quinina
- ☐ Quercetina
- ☐ Recuperadores (mezcla de carbohidratos y proteínas)
- ☐ Ribosa
- ☐ Sinefrina (p-sinefrina)
- ☐ Suplemento de cereza ácida
- ☐ Suplemento de cetonas
- ☐ Taurina
- ☐ Teanina
- ☐ Teacrina
- ☐ Té verde (completo o extractos)
- ☐ Tribulus
- ☐ Tirosina
- ☐ Triglicéridos de cadena media (MCT)
- ☐ Vitamina C
- ☐ Vitamina D
- ☐ Vitamina E
- ☐ Vitamina K
- ☐ Yohimbina
- ☐ Zinc
- ☐ ZMA
- ☐ Otro: \_\_\_\_\_

24. ¿CONSUMES ALGÚN SUPLEMENTO DE LOS MARCADOS EN LA ACTUALIDAD?

\*

*Marca solo un óvalo.*

☐ Si

☐ No

## 25. INDICA QUÉ DÍAS DE PRACTICA DEPORTIVA SUELES CONSUMIRLOS \*

*Marca solo un óvalo.*

- ☐ Entrenamiento      *Salta a la pregunta 23*
- ☐ Competición
- ☐ Entrenamiento y competición
- ☐ Periodo vacacional o de descanso
- ☐ En todos lo casos anteriormente mencionados
- ☐ Otro: \_\_\_\_\_

## 26. INDICA CUANDO SUELES CONSUMIRLOS \*

*Marca solo un óvalo.*

- ☐ Antes de la práctica deportiva
- ☐ Durante la práctica deportiva
- ☐ Después de la práctica deportiva
- ☐ En todos los casos anteriores
- ☐ Indiferentemente
- ☐ Otro: \_\_\_\_\_

## 27. ¿CON QUÉ FIN LOS CONSUMES? \*

*Selecciona todos los que correspondan.*

- ☐ Para cuidar tu salud
- ☐ Por problemas de salud
- ☐ Por necesidad
- ☐ Por obligación
- ☐ Para mejorar su aspecto físico
- ☐ Para buscar rendimiento deportivo
- ☐ Por paliar algún déficit de la dieta
- ☐ Otro: \_\_\_\_\_

## 28. ¿DONDE SUELES COMPRAR LOS SUPLEMENTOS? \*

*Selecciona todos los que correspondan.*

- ☐ En una Farmacia
- ☐ En un Gimnasio
- ☐ A un Amigo
- ☐ A un Monitor
- ☐ A un Dietista-Nutricionista
- ☐ En un Herbolario
- ☐ En un Centro Comercial
- ☐ En una Parafarmacia
- ☐ En Internet
- ☐ En una Tienda especializada
- ☐ Otro: \_\_\_\_\_

## 29. ¿QUÉ/QUIEN TE MOTIVÓ A TOMARLOS? \*

*Selecciona todos los que correspondan.*

- ☐ Compañero de equipo
- ☐ Entrenador
- ☐ Internet
- ☐ Monitor
- ☐ Publicidad
- ☐ Dietista-Nutricionista
- ☐ Revista especializada
- ☐ Televisión
- ☐ Preparador Físico
- ☐ Médico
- ☐ Amigo
- ☐ Otro: \_\_\_\_\_



30. EN GENERAL, ¿CREEES QUE TE DIERON RESULTADOS? \*

*Marca solo un óvalo.*

1    2    3    4    5

NINGÚN ☐ ☐ ☐ ☐ ☐ MUCHO RESULTADO

31. SI FUERA EL CASO, ESCRIBE ALGÚN/OS DE LOS SUPLEMENTOS QUE CREEES QUE NO TE DIERON NINGÚN RESULTADO

---

32. SI FUERA EL CASO, ESCRIBE ALGÚN/OS DE LOS SUPLEMENTOS QUE CREEES QUE SÍ TE DIERON RESULTADO

---

---

---

---

---

33. ¿HAS CONSUMIDO O CONSUMIRÍAS ALGÚN SUPLEMENTO QUE FUERA PERJUDICIAL PARA LA SALUD PERO QUE TE AYUDARA A CONSEGUIR TUS OBJETIVOS? \*

*Marca solo un óvalo.*

- ☐ Si
- ☐ No
- ☐ No sabe/No contesta

34. EN EL CASO QUE LA PREGUNTA ANTERIOR SEA AFIRMATIVA, SEÑALA CUÁL/ES DE LA SIGUIENTE LISTA HAS CONSUMIDO O CONSUMIRÍAS

*Selecciona todos los que correspondan.*

- ☐ Esteroides anabolizantes  
☐ Hormona de crecimiento  
☐ Insulina  
☐ Efedrina  
☐ Pseudoanfetaminas  
☐ Otro: \_\_\_\_\_

35. INDICA, DESDE TU PUNTO DE VISTA, EL USO GENÉRICO DE ESTE TIPO DE SUSTANCIAS EN TRIATLÓN \*

*Marca solo un óvalo.*

|            | 1                     | 2                     | 3                     | 4                     | 5                     |           |
|------------|-----------------------|-----------------------|-----------------------|-----------------------|-----------------------|-----------|
| NINGÚN USO | <input type="radio"/> | MUCHO USO |

---

Este contenido no ha sido creado ni aprobado por Google.

Google Formularios
